# Supplementary material
Source: PubMed Central journal article supplement (PMC9726622)
Supplement: BLT-20-454_Online_Supplementary_Content.pdf [file BLT-20-454_Online_Supplementary_Content.pdf]

**ONLINE SUPPLEMENTARY CONTENT**

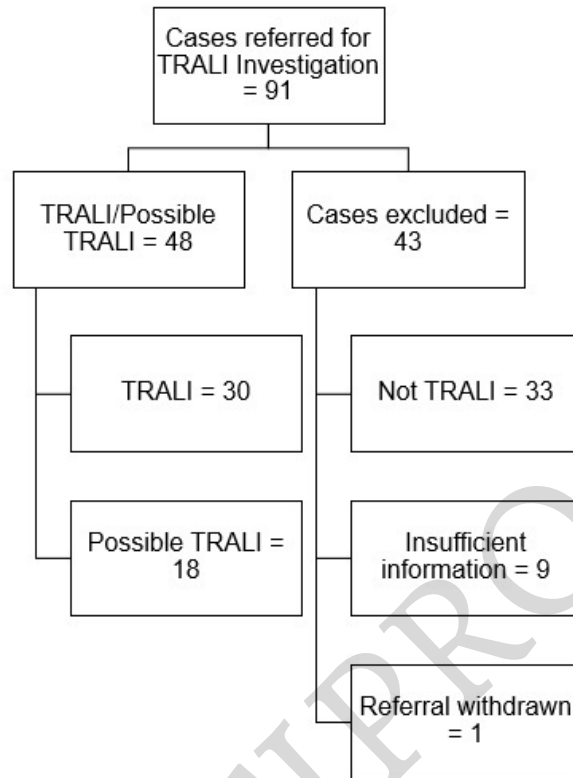

**Figure S1: Flow-chart representing cases referred to Lifeblood for TRALI investigations and case categorisation using Canadian consensus criteria**

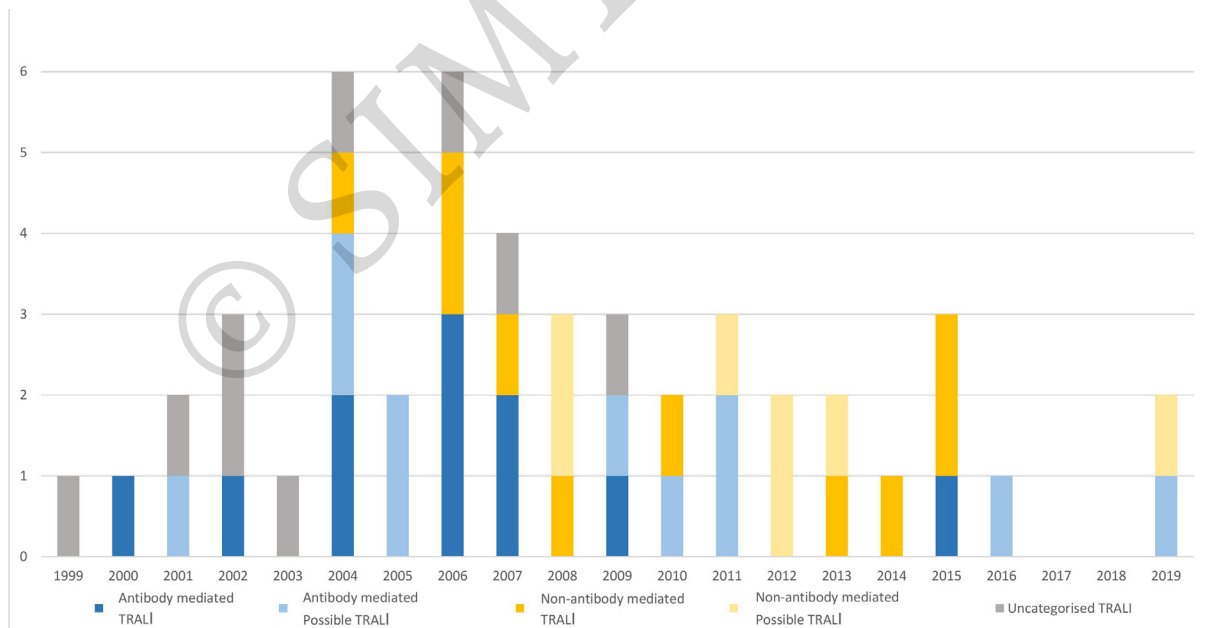

**Figure S2 - Number of cases of TRALI (antibody mediated, non-antibody mediated and uncategorised) and possible TRALI (antibody mediated and non-antibody mediated) referred to Lifeblood QLD from 1999-2019**
